# Supplementary material for: Spatio-temporal expression of ANK2 promotes cytokinesis in oocytes
Source: PubMed Central journal article supplement (PMC6739377; doi:10.1038/s41598-019-49483-5), 2019-09-11
Supplement: 41598_2019_49483_MOESM1_ESM.pdf [file 41598_2019_49483_MOESM1_ESM.pdf]

## SUPPLEMENTAL FIGURES

### Spatio-temporal expression of ANK2 promotes cytokinesis in oocytes

Anna Tetkova, Denisa Jansova, Andrej Susor\*

Laboratory of Biochemistry and Molecular Biology of Germ Cells, IAPG, Czech Republic

\*susor@iapg.cas.cz

**Suppl. Fig. 1: *Ank2.3* mRNA is germ cell specific.** **A)** Confocal RNA FISH images detecting *Ank2.3* mRNA (grey, red) in oocytes and cumulus cells. DNA in blue (DAPI). Representative images from three biological experiments ( $n \geq 19$ ). Scale bar 20  $\mu\text{m}$ . **B)** Quantification of *Ank2.3* mRNA foci in oocytes and cumulus cells.  $N=46$ ; Student's *t*-test, \*\*\*  $p < 0.001$ ; mean  $\pm$ SD. **C)** Representative images of RNA FISH detecting *DapB* bacterial RNA (*Bacillus subtilis*, str. SMY) RNA (EF191515.1) which serves as a negative control. Representative images from at least three biological experiments. Scale bar 20  $\mu\text{m}$ . **D)** Quantification of negative control *DapB* RNA foci in oocytes. Student's *t*-test, mean  $\pm$ SD (1.25; 1.3); NS non-significant;  $n \geq 20$ .

**Suppl. Fig. 2: *Neat2* RNA become dramatically degraded post NEBD.** **A)** qRT-PCR mRNA expression of *Gapdh* and *Neat2* in NE and MII oocytes. Data from three independent experiments were normalized to NE oocytes. Student's *t*-test, \* $P < 0.05$ ; \*\* $P < 0.01$ ; \*\*\* $P < 0.001$ ; NS non-significant. SD  $\pm 0.064$ ; 0.021. **B)** Number of RNA foci at the equatorial confocal section from RNA FISH.  $N \geq 18$ , Student's *t*-test; \*\* $P < 0.01$ ; NS non-significant.

**Suppl. Fig. 3: *Ank2.3* mRNA contains oligopyrimidine tract at 5'UTR.** Secondary structure of *Ank2.3* mRNA generated by mFold software<sup>40</sup>.

**Suppl. Fig. 4: Localization and expression of ANK2 protein during meiotic progression of oocyte.** **A)** Immunolabeling of endogenous ANK2 (grey and green) and tubulin (grey and red) in NE (0h), NEBD (3h), MI (7h) and MII (12h) oocytes. Representative images from at least three biological replicates;  $n \geq 10$ . Scale bars 20  $\mu\text{m}$ . **B)** Detail of ANK2 localization in the oocyte bipolar spindle. Arrowhead depicts cytoplasmic protrusion. Scale bar 10  $\mu\text{m}$ .

**Suppl. Fig. 5: Full gel and immunoblots of segments shown in the main Figures 1A, 6B and 7B.** Arrows denote the bands used.

**Supplementary Table 1: Supplementary tables of primers and RNA FISH probes.** **A)** Primers designed for PCR and qRT-PCR. **B)** Probes used in RNA FISH (RNAScope).

**Suppl. Fig. 5: Full images of gels and immunoblots of segments shown in the main Figure 1, Figure 6 and Figure 7.**

# Supplementary Fig. 1

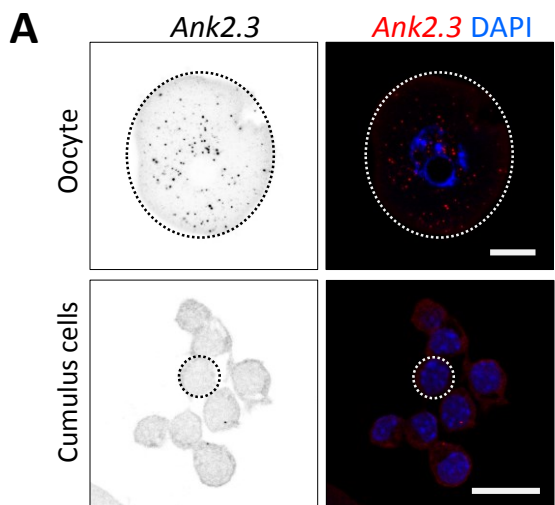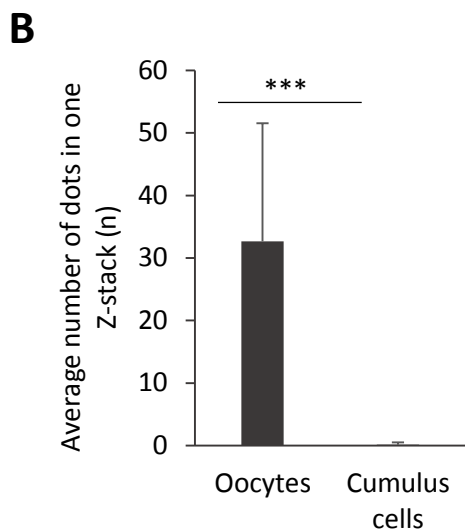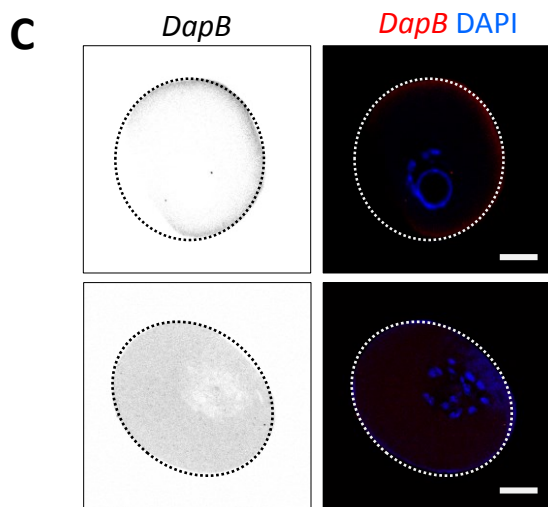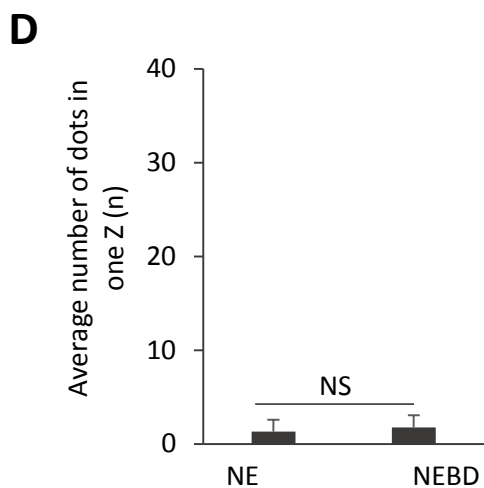

# Supplementary Fig. 2

**A**

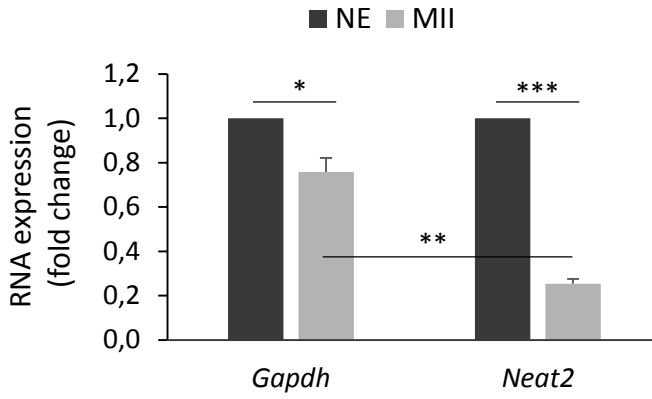

**B**

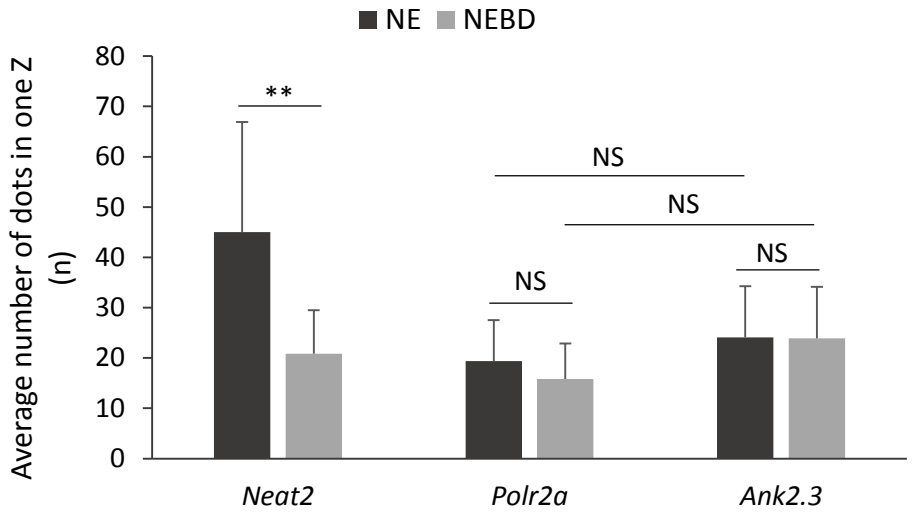



# Supplementary Fig. 4

## A

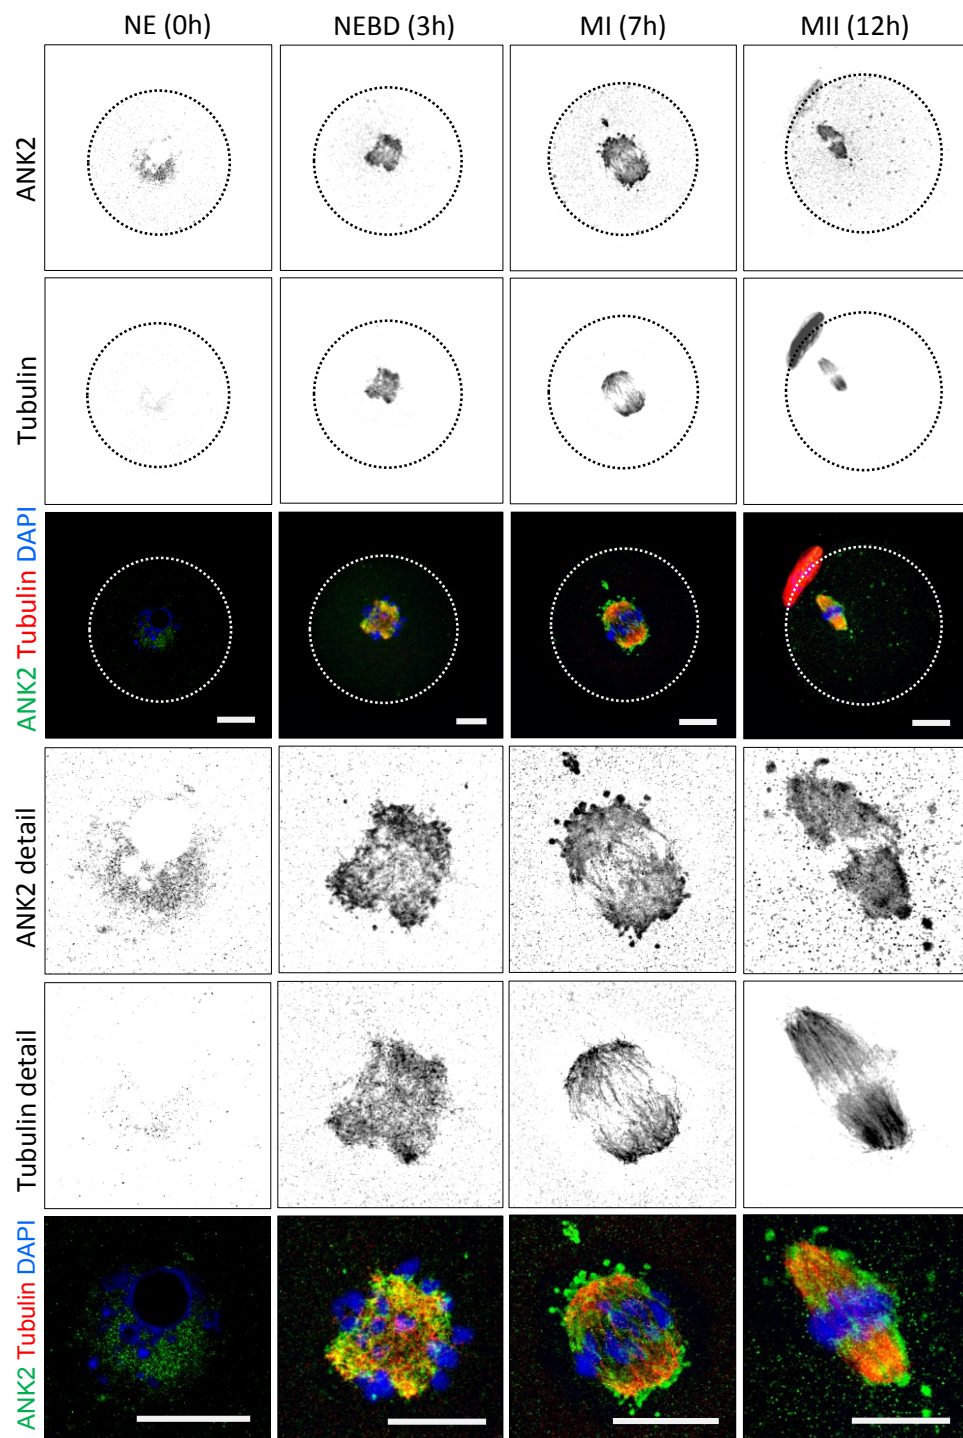

## B

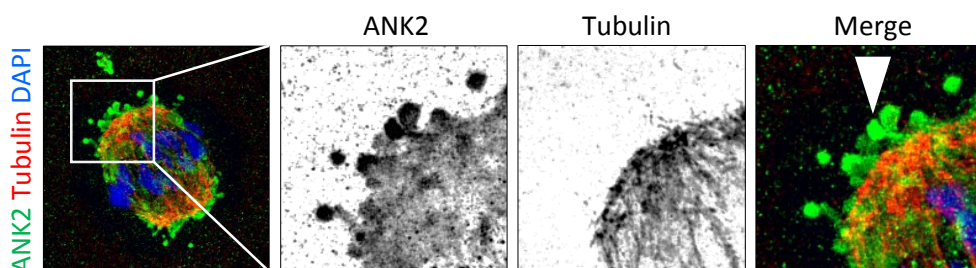

# Supplementary Fig. 5

## A

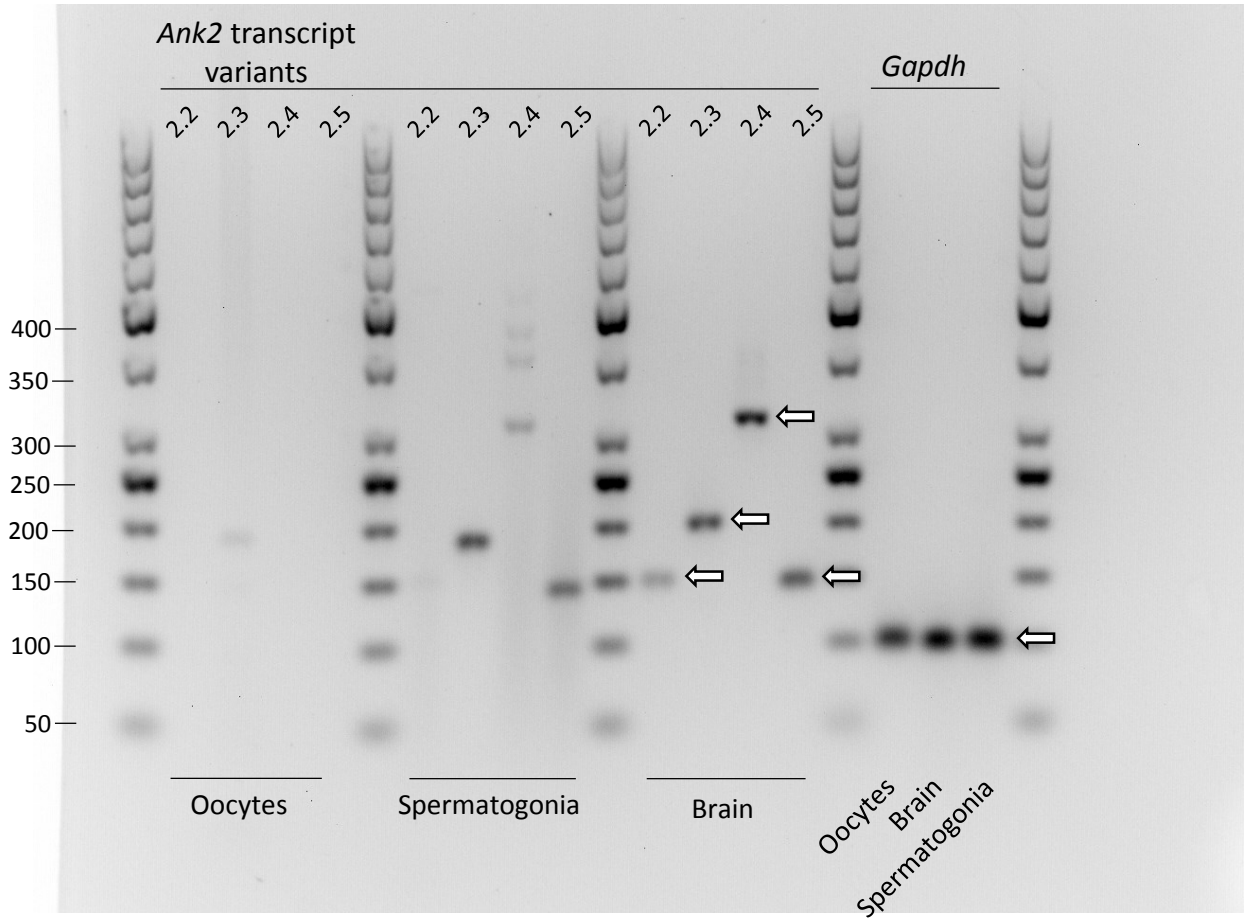

## B

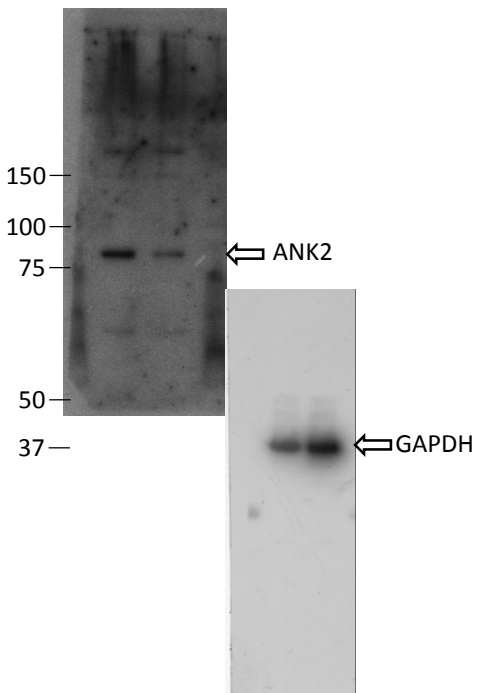

## C

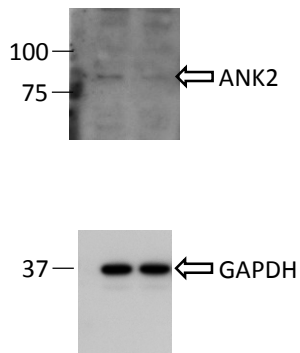

# Supplementary Table. 1

## A

| Official symbol (gene)                     | Gene bank ID   | Forward (5' - 3')        | Reverse (5' - 3')           | Product size (bp) | Annealing temperature (°C) |
|--------------------------------------------|----------------|--------------------------|-----------------------------|-------------------|----------------------------|
| <i>Ank2</i><br><i>transcript variant 2</i> | NM_178655      | GCAGATGGCCTG<br>ACTCTTGA | TGCCATCCAGGAAC<br>TGACTG    | 293               | 60                         |
| <i>Ank2</i><br><i>transcript variant 3</i> | NM_001034168.1 | GCATCAGTCACT<br>GGGGAACA | GGGCCTAGCAGG<br>AGTGGTA     | 196               | 60                         |
| <i>Ank2</i><br><i>transcript variant 4</i> | NM_001327938.1 | CTGCGGTTCGCCT<br>AGAAGC  | TGAGTCCATTCTGA<br>TTGCAGGTA | 309               | 60                         |
| <i>Ank2</i><br><i>transcript variant 5</i> | NM_001327939.1 | AGGCTGTGATGG<br>GAAAGTCG | CAGCAGCTTCTCTC<br>AGCGAT    | 137               | 60                         |
| <i>Gapdh</i>                               | XM_001476707.3 | CGGGAAGCCCAT<br>CACGATTT | GGTCATGAGCCCTT<br>CCACAA    | 93                | 58                         |
| <i>Neat2</i>                               | NR_002847.2    | AGGGAAAAGGGG<br>GAAAGC   | AGGGGTGAAGGGTC<br>TGTGAT    | 133               | 58                         |

## B

| Gene          | Accession No.  | Target Region | No. of ZZ pairs | Cat. No. |
|---------------|----------------|---------------|-----------------|----------|
| <i>Ank2</i>   | NM_001034168.1 | 2685 - 3609   | 20              | 413221   |
| <i>DapB</i>   | EF191515       | 414 - 862     | 10              | 310043   |
| <i>Neat2</i>  | NR_002847.2    | 712 - 2338    | 30              | 313391   |
| <i>Polr2a</i> | NM_009089.2    | 2802 - 3678   | 20              | 312471   |
